# Supplementary material
Source: PubMed Central journal article supplement (PMC7609807)
Supplement: FEB4-10-2363-s001.pdf [file FEB4-10-2363-s001.pdf]

# An investigation into the molecular basis of cancer comorbidities in coronavirus infection

Antonio Facchiano<sup>1\*#</sup>, Francesco Facchiano<sup>2#</sup>, Angelo Facchiano<sup>3#</sup>

<sup>1</sup> Istituto Dermopatico dell'Immacolata, IDI-IRCCS, Rome, Italy;  
email: [a.facchiano@idi.it](mailto:a.facchiano@idi.it)

<sup>(2)</sup> Department of Oncology and Molecular Medicine, Istituto Superiore di Sanità,  
Rome, Italy; email: [francesco.facchiano@iss.it](mailto:francesco.facchiano@iss.it)

<sup>(3)</sup> Institute of Food Science, National Research Council, Avellino, Italy;  
email: [angelo.facchiano@isa.cnr.it](mailto:angelo.facchiano@isa.cnr.it)

\* Correspondence: Antonio Facchiano, [a.facchiano@idi.it](mailto:a.facchiano@idi.it)

## SUPPLEMENTARY MATERIAL

**Figure S1.** Protein and RNA expression in different body districts. NX stands for “Normalized expression”, according to Human Protein Atlas (HPA) database

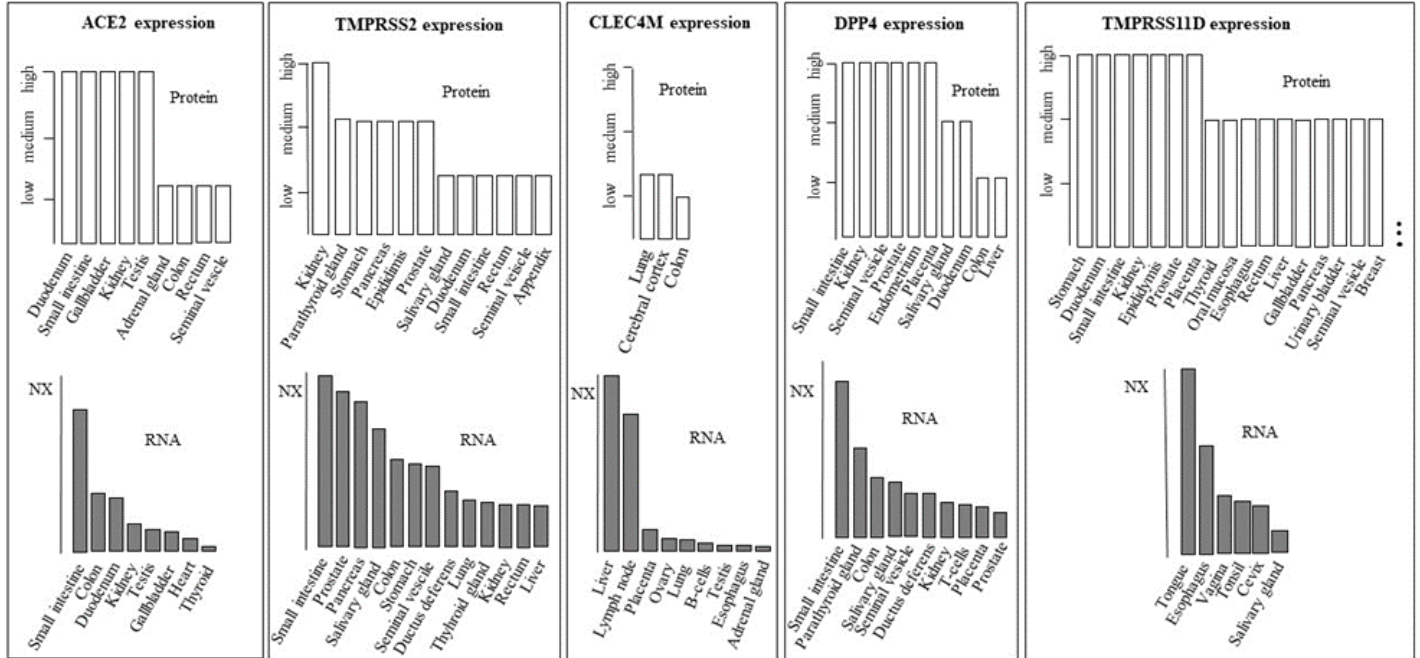

**Supplementary Table 1. Cancer classification and individuals in each cancer category in GEPIA2 and GENT2 databases.** Cancer types are classified with different names in the two databases. For instance, GEPIA2 classifies 3 different kidney cancer types, while GENT2 indicates only 1 general kidney cancer classification. Also, GEPIA2 has two distinct classifications for colon and rectum carcinomas while GENT2 has one generic colon cancer group. The paired classifications as indicated in the table were used to validate GEPIA2 data in GENT2 database.

| GEPIA database                                                |             |             | GENT2 database       |              |             | Totals       |
|---------------------------------------------------------------|-------------|-------------|----------------------|--------------|-------------|--------------|
|                                                               | pz          | ctrl        |                      | pz           | ctrl        |              |
| Adrenocortical carcinoma                                      | 77          | 128         | Adrenal gland cancer | 113          | 18          | <b>336</b>   |
| Bladder Urothelial Carcinoma                                  | 404         | 28          | Bladder cancer       | 191          | 58          | <b>681</b>   |
| Breast invasive carcinoma                                     | 1085        | 291         | Breast cancer        | 6190         | 484         | <b>8050</b>  |
| Cervical squam. cell carcinoma<br>Endocervical adenocarcinoma | 306         | 13          | Cervix cancer        | 117          | 10          | <b>446</b>   |
| Cholangio carcinoma                                           | 36          | 9           |                      |              |             | <b>45</b>    |
| Colon adenocarcinoma                                          | 275         | 349         | Colon cancer         | 4046         | 398         | <b>5068</b>  |
| Lymph neopl diff large B-cell<br>lymph                        | 47          | 337         | Lymph node cancer    | 55           | 1           | <b>440</b>   |
| Esophageal carcinoma                                          | 182         | 286         | Esophagus cancer     | 269          | 23          | <b>760</b>   |
| Glioblastoma multiforme                                       | 163         | 207         |                      |              |             | <b>370</b>   |
| Head & Neck squam cell carc                                   | 519         | 44          | Head and Neck cancer | 216          | 19          | <b>798</b>   |
| Kidney chromophobe                                            | 66          | 53          | Kidney cancer        | 874          | 289         | <b>2251</b>  |
| Kidney renal clear cell carc.                                 | 523         | 100         |                      |              |             |              |
| Kidney renal papill. cell carc.                               | 286         | 60          |                      |              |             |              |
| Acute Myeloid Leukemia                                        | 173         | 70          |                      |              |             | <b>243</b>   |
| Brain Lower Grade Glioma                                      | 518         | 207         | Brain Cancer         | 3552         | 872         | <b>5149</b>  |
| Liver hepatocell carc                                         | 369         | 160         | Liver cancer         | 538          | 214         | <b>1281</b>  |
| Lung adenocarcinoma                                           | 483         | 347         | Lung cancer          | 2648         | 507         | <b>4709</b>  |
| Lung squam. cell carcinoma                                    | 486         | 238         |                      |              |             |              |
| Ovarian serous cystadenocarc                                  | 426         | 88          | Ovary cancer         | 1651         | 109         | <b>2274</b>  |
| Pancreatic adenocarcinoma                                     | 179         | 171         | Pancreas cancer      | 355          | 104         | <b>809</b>   |
| Pheochromocyt and<br>paraganglioma                            | 12          | 3           |                      |              |             | <b>15</b>    |
| Prostate adenocarcinoma                                       | 492         | 152         | Prostate cancer      | 331          | 55          | <b>1030</b>  |
| Rectum adenocarcinoma                                         | 92          | 318         |                      |              |             | <b>410</b>   |
| Sarcoma                                                       | 262         | 2           |                      |              |             | <b>264</b>   |
| Skin cutaneous melanoma                                       | 461         | 558         | Skin cancer          | 754          | 288         | <b>2061</b>  |
| Stomach adenocarcinoma                                        | 408         | 211         | Stomach cancer       | 1112         | 116         | <b>1847</b>  |
| Testicular Germ Cell Tum.                                     | 137         | 165         | Testis cancer        | 4            | 8           | <b>314</b>   |
| Thyroid carcinoma                                             | 512         | 337         | Thyroid cancer       | 325          | 200         | <b>1374</b>  |
| Thymoma                                                       | 118         | 339         |                      |              |             | <b>457</b>   |
| Uterine corpus endometr carc.                                 | 174         | 91          | Endometrium cancer   | 473          | 72          | <b>810</b>   |
| Uterine carcinosarcoma                                        | 57          | 78          | Uterus cancer        | 512          | 57          | <b>704</b>   |
| <b>Totals</b>                                                 | <b>9328</b> | <b>5440</b> |                      | <b>24326</b> | <b>3902</b> | <b>42996</b> |

**Supplementary Table 2.**

DAVID / Genetic Association Database (GAD) analysis for the 5 genes with related genes obtained by Genemania analysis.

The list of GAD diseases associated to each of the 5 genes is reported below. In the ACE2 case the list has been restricted to the top 25 diseases.

| Gene | GAD_DISEASE Term                                                                                               | Count | %  | P Value  | Genes                                      |
|------|----------------------------------------------------------------------------------------------------------------|-------|----|----------|--------------------------------------------|
| ACE2 | nephropathy, diabetic                                                                                          | 4     | 20 | 6.69E-06 | ACE, AGT, ACE2, GHRL                       |
|      | sudden cardiac arrest risk                                                                                     | 3     | 15 | 3.48E-05 | ACE, AGT, ACE2                             |
|      | Atrial Fibrillation                                                                                            | 3     | 15 | 9.67E-05 | ACE, AGT, ACE2                             |
|      | Pregnancy Complications                                                                                        | 3     | 15 | 1.48E-04 | ACE, AGT, CAT                              |
|      | Chronic renal failure   Kidney Failure, Chronic                                                                | 7     | 35 | 3.28E-04 | SLC12A6, FRK, ACE, AGT, GHRL, CAT, SLC10A2 |
|      | left ventricular hypertrophy                                                                                   | 3     | 15 | 5.33E-04 | ACE, AGT, ACE2                             |
|      | Type 2 diabetes                                                                                                | 5     | 25 | 6.25E-04 | ACE, AGT, ACE2, GHRL, CAT                  |
|      | Insulin Resistance                                                                                             | 4     | 20 | 7.93E-04 | ACE, AGT, GHRL, SLC10A2                    |
|      | DNA damage                                                                                                     | 3     | 15 | 9.97E-04 | ACE, AGT, CAT                              |
|      | blood pressure, arterial                                                                                       | 3     | 15 | 0.001854 | ACE, AGT, ACE2                             |
|      | Chronic renal failure   Diabetic Nephropathies   Diabetic Nephropathy   Hypertension   Kidney Failure, Chronic | 2     | 10 | 0.0023   | ACE, AGT                                   |
|      | Brain Ischemia   Carotid Artery Diseases                                                                       | 2     | 10 | 0.0023   | ACE, AGT                                   |
|      | Nonfamilial Hypertrophic or Dilated Cardiomyopathy                                                             | 2     | 10 | 0.0023   | ACE, AGT                                   |
|      | diabetes, type 2; polymetabolic syndrome                                                                       | 2     | 10 | 0.0023   | ACE, AGT                                   |
|      | Marfan Syndrome   Mitral Valve Prolapse                                                                        | 2     | 10 | 0.0023   | ACE, AGT                                   |
|      | obesity; blood pressure, arterial; sleep apnea                                                                 | 2     | 10 | 0.0023   | ACE, AGT                                   |
|      | Adult Respiratory Distress Syndrome   Chromosome Deletion   Respiratory Distress Syndrome, Adult               | 2     | 10 | 0.0023   | ACE, AGT                                   |
|      | Chronic renal failure   Hypertension   Kidney Failure, Chronic                                                 | 2     | 10 | 0.0023   | ACE, AGT                                   |
|      | Hypertension   Polycystic Kidney Diseases                                                                      | 2     | 10 | 0.0023   | ACE, AGT                                   |
|      | Kidney Failure   kidney; failure   Lupus Nephritis   Nephritis SLE                                             | 2     | 10 | 0.0023   | ACE, AGT                                   |
|      | Brain Infarction   Brain Ischemia   Cerebrovascular Disorders   Hypertension   Leukoaraiosis                   | 2     | 10 | 0.0023   | ACE, AGT                                   |

|         |                                                                                                           |   |    |          |                                                        |
|---------|-----------------------------------------------------------------------------------------------------------|---|----|----------|--------------------------------------------------------|
|         | Albuminuria   Diabetes Mellitus, Type 2   Diabetic Nephropathies                                          | 2 | 10 | 0.0023   | ACE, AGT                                               |
|         | hypertension; renal dysfunction, posttransplantation                                                      | 2 | 10 | 0.0034   | ACE, AGT                                               |
|         | Fibromuscular Dysplasia   Hypertension   Renal Artery Obstruction                                         | 2 | 10 | 0.0034   | ACE, AGT                                               |
|         | Chronic renal failure   Kidney Failure, Chronic   Uremia   Vesico-Ureteral Reflux   Vesicoureteral reflux | 2 | 10 | 0.0034   | ACE, AGT                                               |
| TMPRSS2 | prostate specific antigen                                                                                 | 2 | 10 | 0.0027   | AR, KLK3                                               |
|         | clinical parameters and endocrine status in elderly men                                                   | 2 | 10 | 0.0041   | AR, KLK3                                               |
|         | prostate cancer                                                                                           | 5 | 24 | 0.0046   | TMPRSS2, AR, KLK2, KLK3, KLK4                          |
|         | prostate volume/histology endocrine patterns                                                              | 2 | 10 | 0.0069   | AR, KLK3                                               |
|         | Depression                                                                                                | 3 | 14 | 0.0193   | AR, EMX2, PDE9A                                        |
|         | prostatic hyperplasia                                                                                     | 2 | 10 | 0.0301   | AR, KLK3                                               |
|         | Azoospermia   Oligospermia                                                                                | 2 | 10 | 0.0659   | AR, KDM3A                                              |
|         | Personality                                                                                               | 2 | 10 | 0.0762   | AR, NGF                                                |
| CLEC4M  | Severe Acute Respiratory Syndrome                                                                         | 3 | 14 | 5.50E-04 | CLEC4G, CD209, CLEC4M                                  |
|         | HIV Infections   Sexually Transmitted Diseases                                                            | 2 | 10 | 0.0043   | CD209, CLEC4M                                          |
|         | HIV Infections                                                                                            | 3 | 14 | 0.0044   | CD209, TLR2, CLEC4M                                    |
|         | Leprosy                                                                                                   | 3 | 14 | 0.0052   | FCN2, CD209, TLR2                                      |
|         | Vaginosis, Bacterial                                                                                      | 2 | 10 | 0.0087   | CRHBP, TLR2                                            |
|         | Glomerulonephritis, IGA                                                                                   | 3 | 14 | 0.0120   | TLR2, CETP, ITGAM                                      |
|         | Pregnancy Complications, Infectious   Vaginosis, Bacterial                                                | 2 | 10 | 0.0131   | TLR2, LBP                                              |
|         | chronic obstructive pulmonary disease                                                                     | 4 | 19 | 0.0213   | TLR2, TFF3, CD4, CETP                                  |
|         | Malaria, Cerebral                                                                                         | 2 | 10 | 0.0217   | TLR2, TIMD4                                            |
|         | Cardiovascular Diseases                                                                                   | 3 | 14 | 0.0306   | SAA1, TLR2, CETP                                       |
|         | Birth Weight   Leukemia   Leukemia, Myeloid, Acute   Precursor Cell Lymphoblastic Leukemia-Lymphoma       | 3 | 14 | 0.0362   | CD209, TLR2, LBP                                       |
|         | HIV                                                                                                       | 3 | 14 | 0.0365   | CD209, TLR2, CLEC4M                                    |
|         | Meningeal Neoplasms   meningioma                                                                          | 3 | 14 | 0.0372   | CD209, TLR2, LBP                                       |
|         | lung cancer                                                                                               | 4 | 19 | 0.0377   | TLR2, TFF3, CD4, CETP                                  |
|         | Bladder Cancer                                                                                            | 4 | 19 | 0.0401   | TLR2, TFF3, CD4, CETP                                  |
| DPP4    | Bulimia                                                                                                   | 5 | 24 | 1.26E-04 | GRP, PREP, MAOA, IGF1, DPP4                            |
|         | Type 2 Diabetes   edema   rosiglitazone                                                                   | 9 | 43 | 0.0086   | BCKDK, MAOA, DPP10, IGF1, DPP6, CXCL12, DPP4, ADA, FN1 |
|         | Lymphopenia   SCID   Severe Combined Immunodeficiency                                                     | 2 | 10 | 0.0131   | PTPRC, ADA                                             |

|           |                                      |   |    |        |                           |
|-----------|--------------------------------------|---|----|--------|---------------------------|
|           | anxiety disorder                     | 2 | 10 | 0.0188 | MAOA, CAMKK2              |
|           | Bipolar Disorder                     | 4 | 19 | 0.0204 | PREP, MAOA, DPP10, CAMKK2 |
|           | diabetes, type 2                     | 4 | 19 | 0.0249 | PREP, PDK4, IGF1, ADA     |
|           | diabetes, type 1                     | 3 | 14 | 0.0309 | PTPRC, CXCL12, ADA        |
|           | systemic sclerosis                   | 2 | 10 | 0.0331 | PTPRC, FN1                |
|           | mental retardation                   | 2 | 10 | 0.0331 | MAOA, ADA                 |
|           | Coronary Artery Disease              | 4 | 19 | 0.0366 | PREP, IGF1, CXCL12, FN1   |
|           | Scoliosis                            | 2 | 10 | 0.0374 | IGF1, DPP9                |
|           | Colonic Neoplasms                    | 2 | 10 | 0.0528 | IGF1, ADA                 |
|           | Lung Cancer                          | 4 | 19 | 0.0534 | MAOA, IGF1, CXCL12, FN1   |
|           | Birth Weight                         | 2 | 10 | 0.0598 | IGF1, ADA                 |
|           | several psychiatric disorders        | 3 | 14 | 0.0700 | GRP, MAOA, ADA            |
|           | panic disorder                       | 2 | 10 | 0.0735 | GRP, MAOA                 |
|           | autism                               | 3 | 14 | 0.0950 | MAOA, IGF1, ADA           |
| TMPRSS11D | Eczema                               | 2 | 10 | 0.0099 | KLK7, SPINK5              |
|           | Dermatitis, Atopic   Eczema allergic | 2 | 10 | 0.0237 | KLK7, SPINK5              |
|           | Dermatitis, Atopic                   | 2 | 10 | 0.0374 | S100A7, SPRR1B            |
|           | prostate cancer                      | 3 | 14 | 0.0904 | KLK7, KLK12, KLK13        |
